# Supplementary material for: A Cd-MOF fluorescence sensor with dual functional sites for efficient detection of metal ions in multifarious water environments
Source: Royal Society of Chemistry journal article supplement (doi:10.1039/d1ce01308d), 2021-01-01
Supplement: d1ce01308d1.pdf [file d1ce01308d1.pdf]

## Electronic Supporting Information (ESI)

### **A Cd-MOF fluorescence sensor with dual functional sites for efficient detection of metal ions in multifarious water environments**

Jing Li, Yun-Xiu Zhao, Qian Wu, Hua Yang, Jing Lu, Hui-Yan Ma,\* Su-Na Wang\* and Yun-Wu Li\*

Shandong Provincial Key Laboratory/Collaborative Innovation Center of Chemical Energy Storage and Novel Cell Technology, and School of Chemistry and Chemical Engineering, Liaocheng University, Liaocheng 252000, P. R. China.

\*Corresponding authors: mahuiyanyan@163.com; wangsun@lcu.edu.cn; liyunwu@lcu.edu.cn.

---

## S1. Experimental section

### S1.1 Materials and methods

The ligand Htpc was synthesized by a modified literature method.<sup>S1-S3</sup> Other chemicals were obtained commercially and used as received. Powder X-ray diffraction (PXRD) were performed on a D/MAX-rA (Rigaku) diffractometer with Cu  $K\alpha$  radiation ( $\lambda = 1.542 \text{ \AA}$ ) with a scan rate of 4 °/min at 36 kV and 20 mA. X-ray photoelectron spectrums (XPS) were performed on ESCALAB Xi+. Thermogravimetric (TG) analyses were performed on TGA550 instrument at a heating rate of 20 °C/min from 50 °C to 800 °C under nitrogen atmosphere. FT-IR spectra were conducted with a NICOLET iS50 FT-IR spectrometer. UV-Vis measurements were carried out by a UV- 3600 Plus spectrophotometer. Luminescence lifetimes were carried out on a FLS1000 spectrophotometer analyzer of Edinburgh instruments. Fluorescence sensing properties were performed on the Hitachi F-7000 fluorescence spectrophotometer.

### S1.2 Syntheses of LCU-109

A mixture of  $\text{CdCl}_2 \cdot 4\text{H}_2\text{O}$  (220.1 mg, 1.2 mmol), Pyrazine dicyanide (65 mg, 1.0 mmol),  $\text{NaN}_3$  (65 mg, 1.0 mmol),  $\text{NaHCO}_3$  (2.5 mg, 0.003mmol) and  $\text{H}_3\text{btc}$  (35.7 mg, 0.17 mmol) with 15 mL of water was sealed in a 25 mL Teflon-lined stainless steel autoclave and heated to 140 °C. The autoclave was kept at 140 °C for 3 days and then cooled to room at a cooling rate of 4 °C/h. Yellow block crystals of **LCU-109** were obtained, washed with water, and dried in air. Yield: 29 % based on Cd. Elemental analysis (%) for **LCU-109**,  $\text{C}_{15}\text{H}_{11}\text{Cd}_2\text{N}_7\text{O}_9$  (M = 658.11): Calcd.: C, 27.36; H, 1.68;

---

N, 14.90; Found: C, 37.48; H, 1.61; N, 14.85. The FT-IR spectra see **Fig. S1** in **ESI**.

### **S1.3 X-ray crystallography**

Single crystal X-ray diffraction measurement was carried out on a Rigaku SCX-mini diffractometer and determined at 298(2) K with Mo- $K\alpha$  radiation ( $\lambda = 0.71073$  Å). The crystal data were solved by direct methods and refined by a full-matrix least-square method on  $F^2$  using the SHELXL-97 crystallographic software packages. Cd atoms in **LCU-109** were found from  $E$ -maps and other non-hydrogen atoms were located in successive difference Fourier syntheses. The final refinement was performed by full matrix least-squares methods with anisotropic thermal parameters for non-hydrogen atoms on  $F^2$ . The hydrogen atoms of organic ligands were added theoretically, riding on the concerned atoms and refined with fixed thermal factors. The hydrogen atoms of coordinated H<sub>2</sub>O and free H<sub>2</sub>O were added by successive difference Fourier syntheses. During the refinement of the compound, the command “omit -1 50.04” was used to omit some disagreeable reflections. Further details of crystal data and structure refinement for **LCU-109** were summarized as follows in **Table S1**. Selected bond lengths of **LCU-109** were given in **Table S2**. Full crystallographic data for **LCU-109** have been deposited with the **CCDC (No.: 2095374)**. These data can be obtained free of charge from The Cambridge Crystallographic Data Centre via [www.ccdc.cam.ac.uk/data\\_request/cif](http://www.ccdc.cam.ac.uk/data_request/cif).

**Table S1** Crystal data and structure refinement parameters for **LCU-109**.

| <b>MOF</b>         |                                                                               | <b>LCU-109</b>                               |               |
|--------------------|-------------------------------------------------------------------------------|----------------------------------------------|---------------|
| Formula            | C <sub>15</sub> H <sub>11</sub> Cd <sub>2</sub> N <sub>7</sub> O <sub>9</sub> | $\gamma$ [°]                                 | 80.6270(10)   |
| $F_w$              | 658.11                                                                        | $V$ (Å <sup>3</sup> )                        | 940.00(15)    |
| $\lambda/\text{Å}$ | 0.71073                                                                       | $Z$                                          | 2             |
| $T/\text{K}$       | 298(2)                                                                        | $D_c/\text{Mg/m}^3$                          | 2.325         |
| Crystal system     | Triclinic                                                                     | $F(000)$                                     | 636           |
| Space group        | P-1                                                                           | Reflections collected/unique                 | 4623/3258     |
| $a$ [Å]            | 8.3887(7)                                                                     | $R_{\text{int}}$                             | 0.0724        |
| $b$ [Å]            | 10.3405(9)                                                                    | Data/Restraints/Parameters                   | 3258/3/298    |
| $c$ [Å]            | 11.1345(11)                                                                   | $R_1/wR_2$ [ $I > 2\sigma(I)$ ] <sup>a</sup> | 0.0930/0.2815 |
| $\alpha$ [°]       | 80.6520(10)                                                                   | $R_1/wR_2$ [(all data)] <sup>b</sup>         | 0.1012/0.3073 |
| $\beta$ [°]        | 89.883(2)                                                                     | GOF on $F^2$                                 | 0.957         |

<sup>a</sup> $R_1 = \Sigma(|F_0| - |F_C|)/\Sigma|F_0|$ ; <sup>b</sup> $wR_2 = [\Sigma w(|F_0|^2 - |F_C|^2)^2/(\Sigma w|F_0|^2)^2]^{1/2}$ .

**Table S2** The selected bond lengths [ $\text{\AA}$ ] and angles [ $^\circ$ ] of **LCU-109**.

|              |           |              |           |
|--------------|-----------|--------------|-----------|
| N(5)-Cd(2)#1 | 2.499(10) | Cd(1)-O(6)#4 | 2.229(9)  |
| O(3)-Cd(2)#2 | 2.286(8)  | Cd(1)-O(4)#2 | 2.277(9)  |
| O(4)-Cd(1)#2 | 2.277(9)  | Cd(1)-O(2)   | 2.280(8)  |
| O(6)-Cd(1)#3 | 2.229(9)  | Cd(1)-O(1W)  | 2.290(9)  |
| N(4)-Cd(2)#1 | 2.433(8)  | Cd(1)-N(2)   | 2.331(9)  |
| Cd(1)-O(5)#4 | 2.605(11) | Cd(2)-O(1)   | 2.342(9)  |
| Cd(2)-O(3)#2 | 2.286(8)  | Cd(2)-N(3)   | 2.398(10) |
| Cd(2)-O(2W)  | 2.295(10) | Cd(2)-N(4)#1 | 2.434(8)  |
| O(5)-Cd(1)#3 | 2.605(10) | Cd(2)-N(5)#1 | 2.499(10) |

|                     |          |                     |          |
|---------------------|----------|---------------------|----------|
| O(6)#4-Cd(1)-O(4)#2 | 99.3(4)  | O(4)#2-Cd(1)-N(2)   | 83.4(3)  |
| O(6)#4-Cd(1)-O(2)   | 141.8(3) | O(2)-Cd(1)-N(2)     | 113.1(3) |
| O(4)#2-Cd(1)-O(2)   | 86.3(3)  | O(1W)-Cd(1)-N(2)    | 91.2(3)  |
| O(6)#4-Cd(1)-O(1W)  | 91.8(4)  | O(6)#4-Cd(1)-O(5)#4 | 53.0(3)  |
| O(4)#2-Cd(1)-O(1W)  | 168.6(3) | O(4)#2-Cd(1)-O(5)#4 | 102.7(3) |
| O(2)-Cd(1)-O(1W)    | 86.7(4)  | O(2)-Cd(1)-O(5)#4   | 88.8(3)  |
| O(6)#4-Cd(1)-N(2)   | 105.1(4) | O(1W)-Cd(1)-O(5)#4  | 86.1(3)  |
| O(3)#2-Cd(2)-O(2W)  | 88.7(4)  | N(2)-Cd(1)-O(5)#4   | 157.7(3) |
| O(3)#2-Cd(2)-O(1)   | 84.0(3)  | N(3)-Cd(2)-N(4)#1   | 88.4(3)  |
| O(2W)-Cd(2)-O(1)    | 163.7(3) | O(3)#2-Cd(2)-N(5)#1 | 75.6(3)  |
| O(3)#2-Cd(2)-N(3)   | 127.3(3) | O(2W)-Cd(2)-N(5)#1  | 98.6(4)  |
| O(2W)-Cd(2)-N(3)    | 93.5(4)  | O(1)-Cd(2)-N(5)#1   | 93.6(3)  |
| O(1)-Cd(2)-N(3)     | 79.6(3)  | N(3)-Cd(2)-N(5)#1   | 154.5(3) |
| O(3)#2-Cd(2)-N(4)#1 | 144.2(3) | N(4)#1-Cd(2)-N(5)#1 | 69.2(3)  |
| O(2W)-Cd(2)-N(4)#1  | 90.7(4)  | O(1)-Cd(2)-N(4)#1   | 103.7(3) |
|                     |          |                     |          |

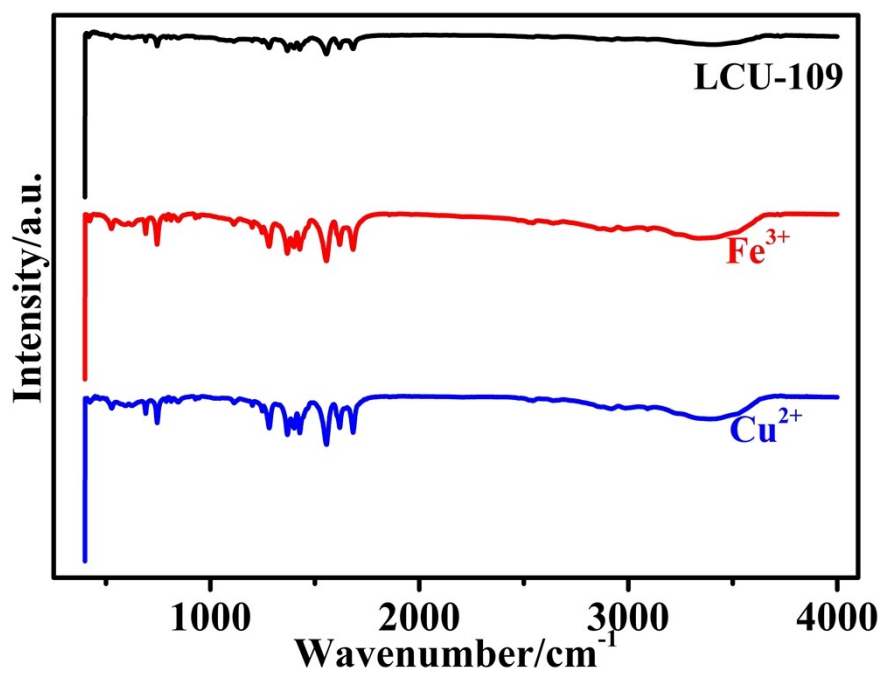

**Fig. S1** IR spectrum of LCU-109 soaked in water solutions containing Fe<sup>3+</sup> or Cu<sup>2+</sup> for three days.

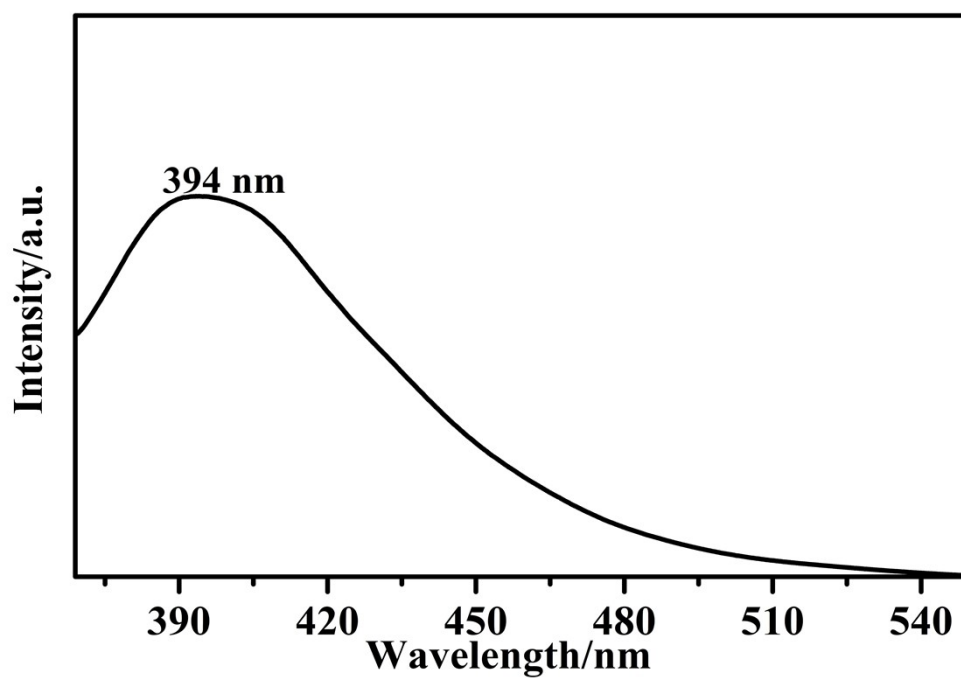

**Fig. S2** The emission spectra of H<sub>3</sub>btc in the solid state at room temperature ( $\lambda_{\text{ex}} = 348$  nm).

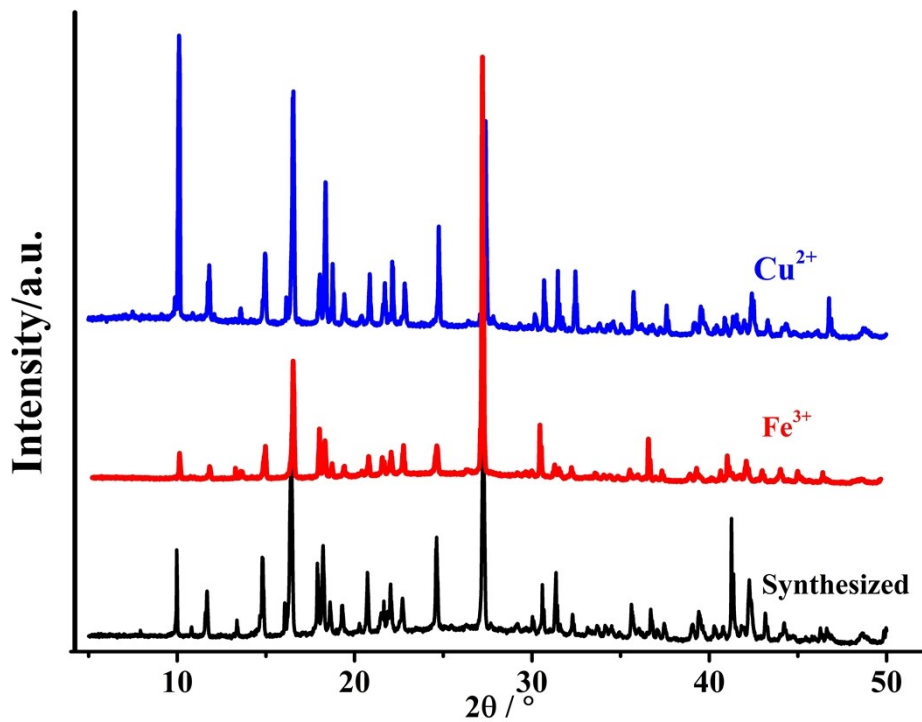

**Fig. S3** PXRD of LCU-109 soaked in water solutions containing Fe<sup>3+</sup> or Cu<sup>2+</sup> for three days.

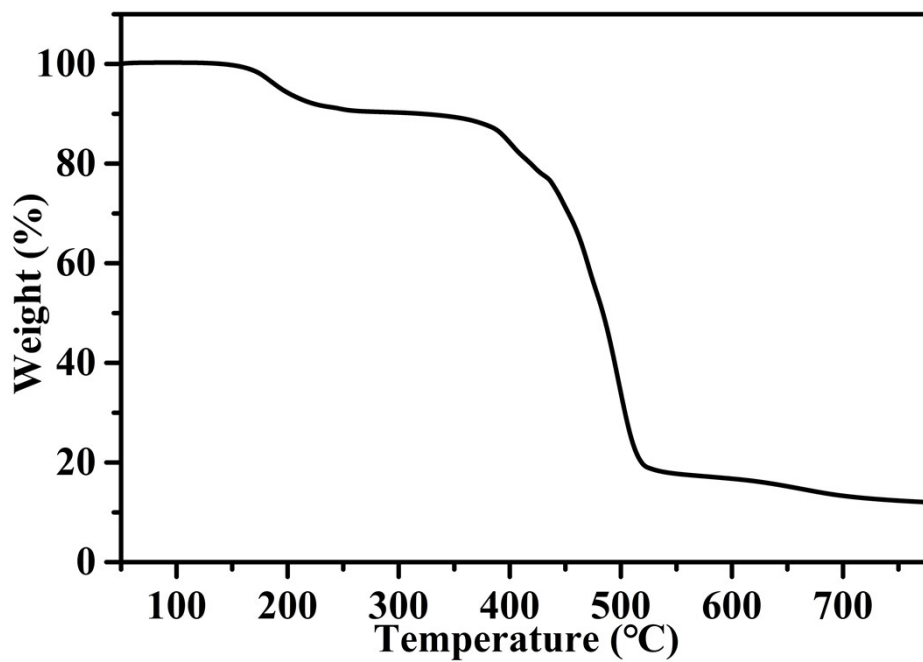

**Fig. S4** TGA curve of LCU-109.

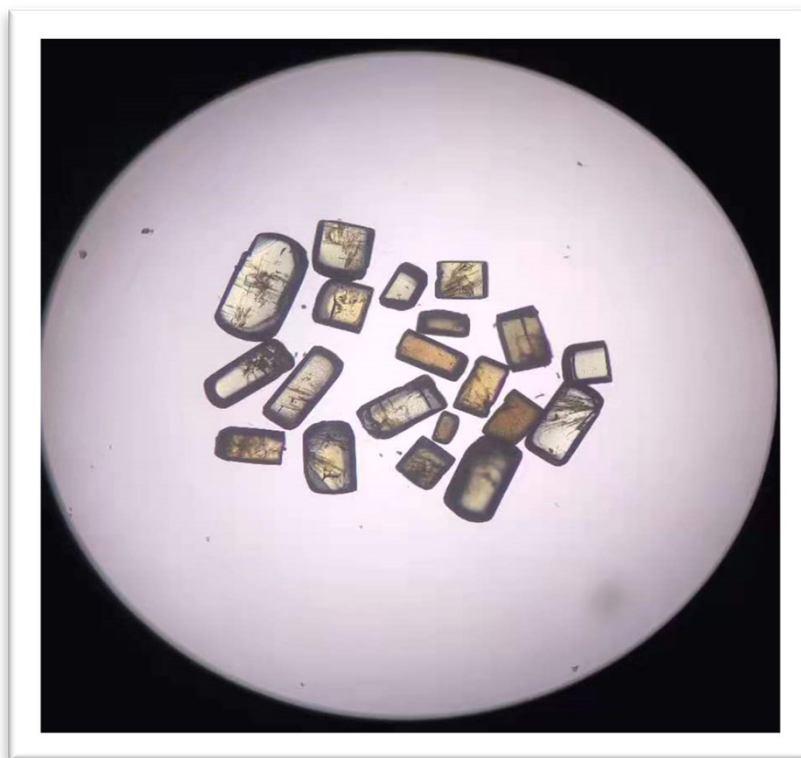

**Fig. S5** A picture of LCU-109 under a microscope.

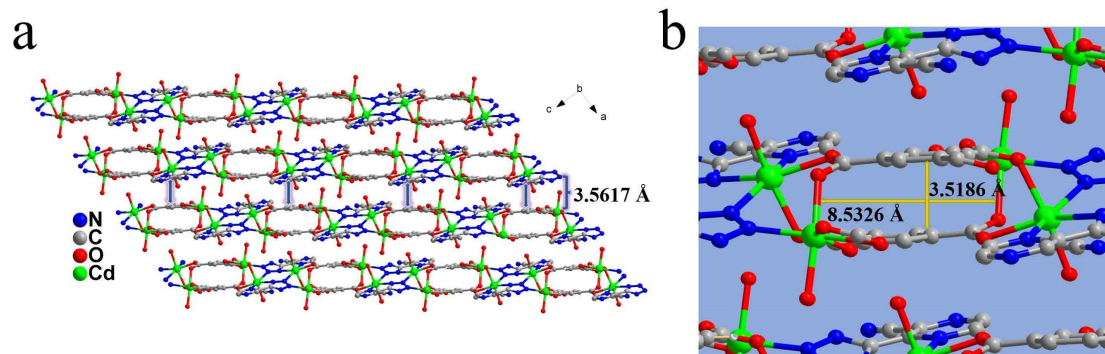

**Fig. S6** (a) 3D stacked structure of LCU-109. (b) The hole of LCU-109 along the *b* axis.



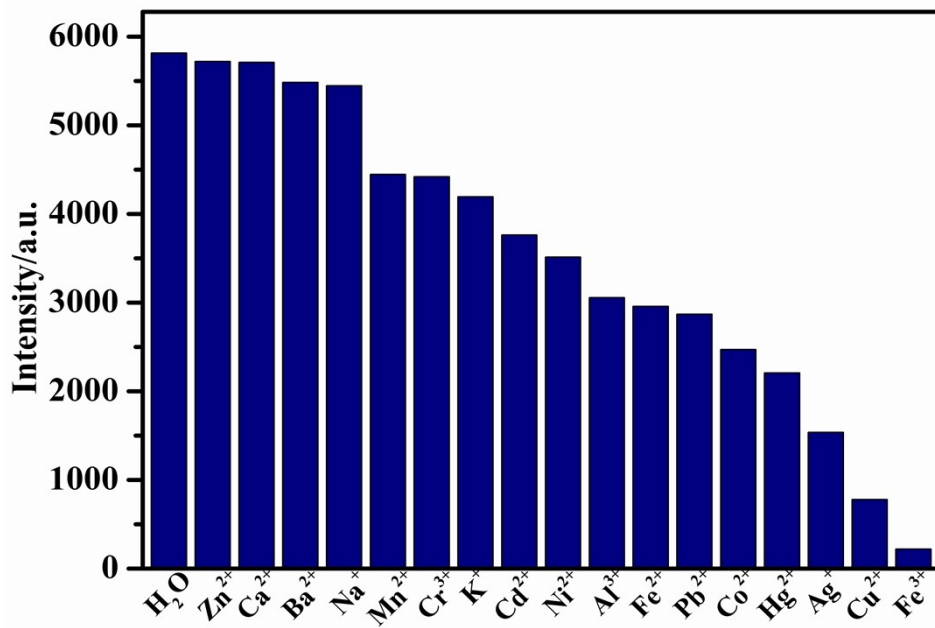

**Fig. S7** Luminescence intensities of LCU-109 in water solutions with different cations (10<sup>-3</sup> M).

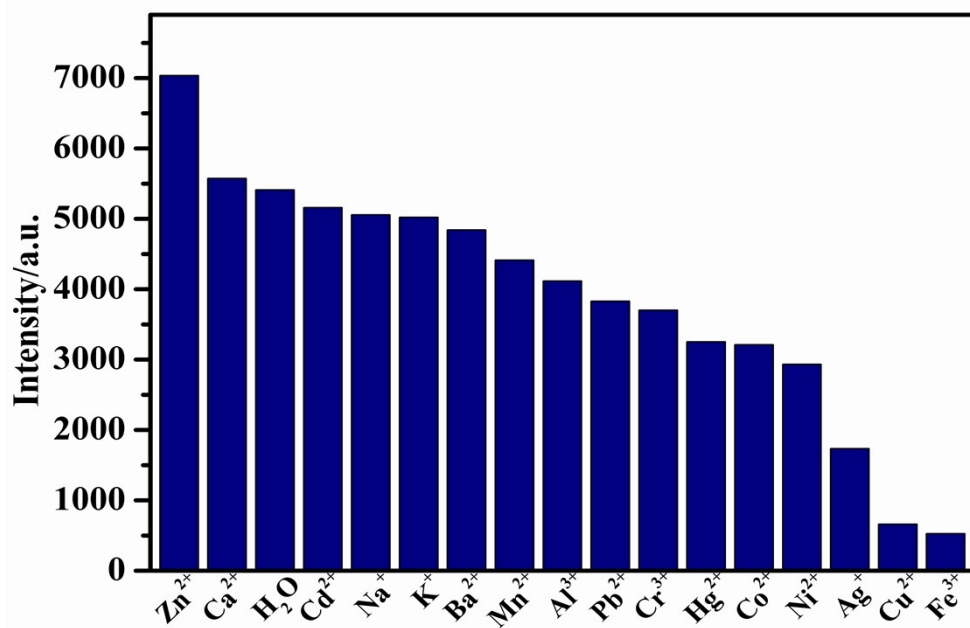

**Fig. S8** Luminescence intensities of LCU-109 in actual water samples with different cations (10<sup>-3</sup> M).

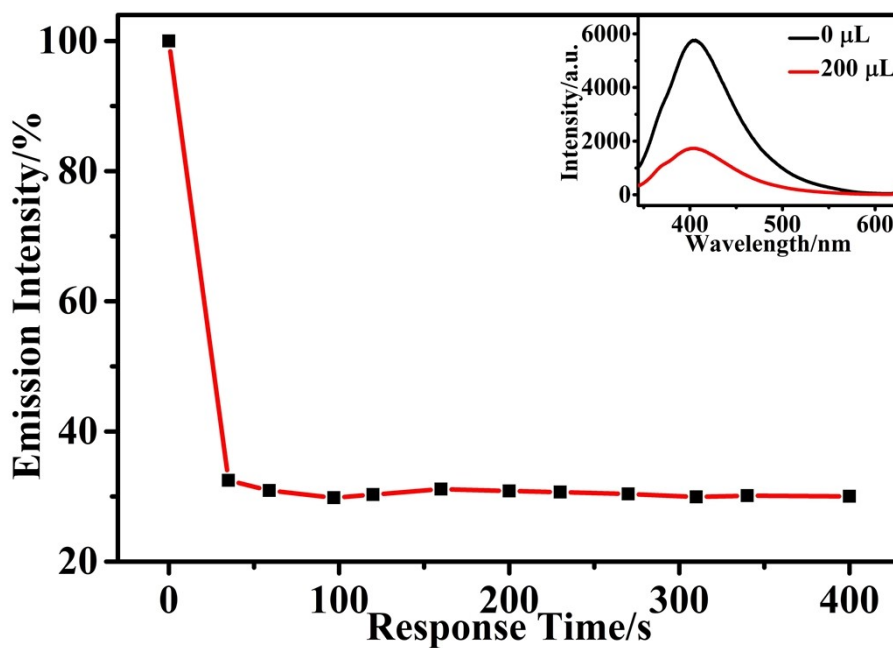

Fig. S9 Time response for Fe<sup>3+</sup> recognition of LCU-109.

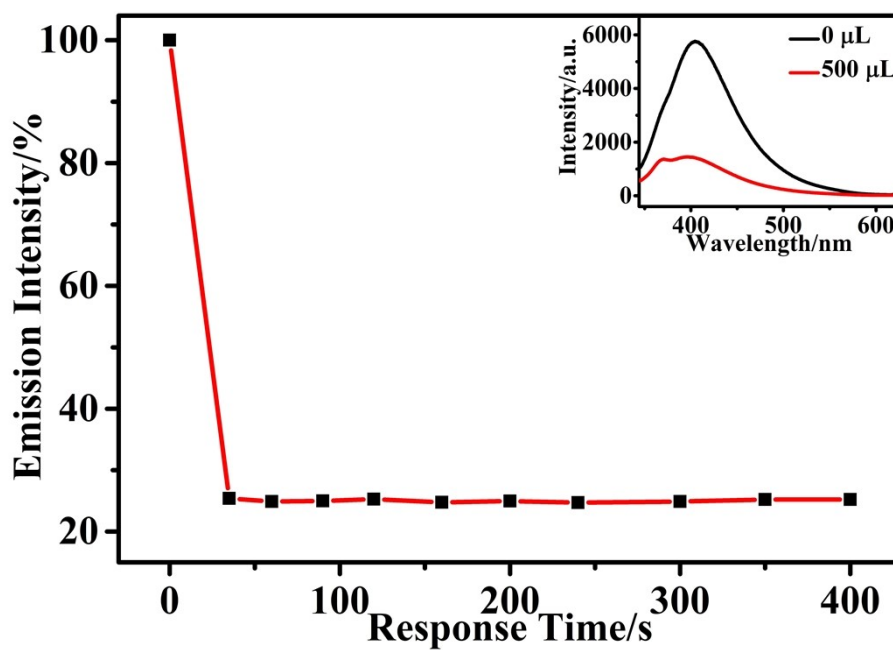

Fig. S10 Time response for Cu<sup>2+</sup> recognition of LCU-109.

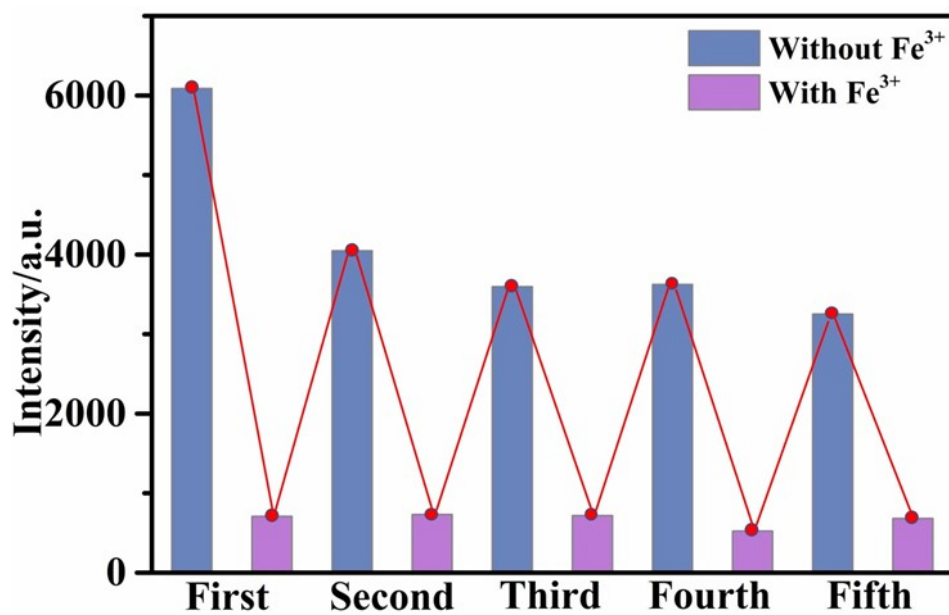

Fig. S11 Recyclability of LCU-109 after five runs of sensing Fe<sup>3+</sup> ions.

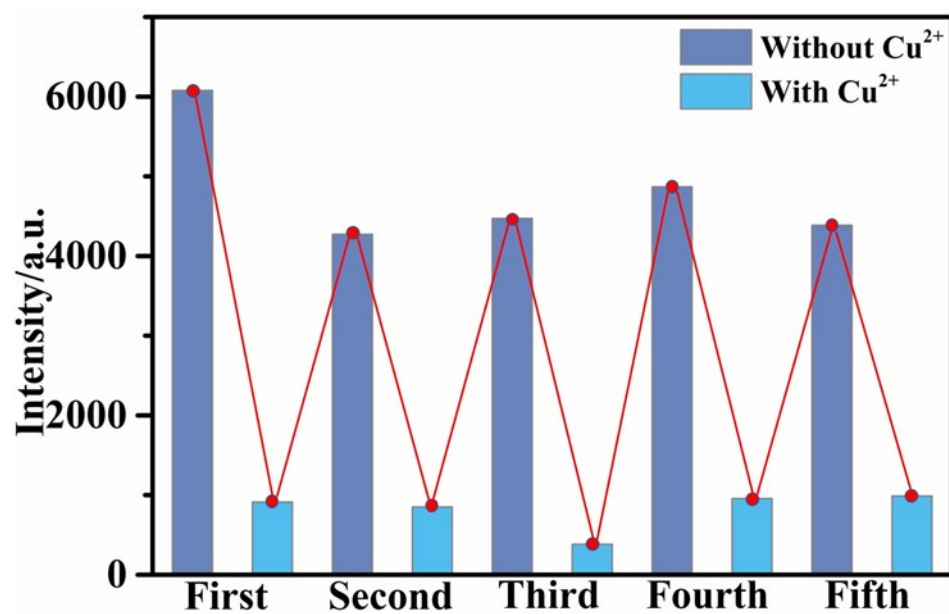

Fig. S12 Recyclability of LCU-109 after five runs of sensing Cu<sup>2+</sup> ions.

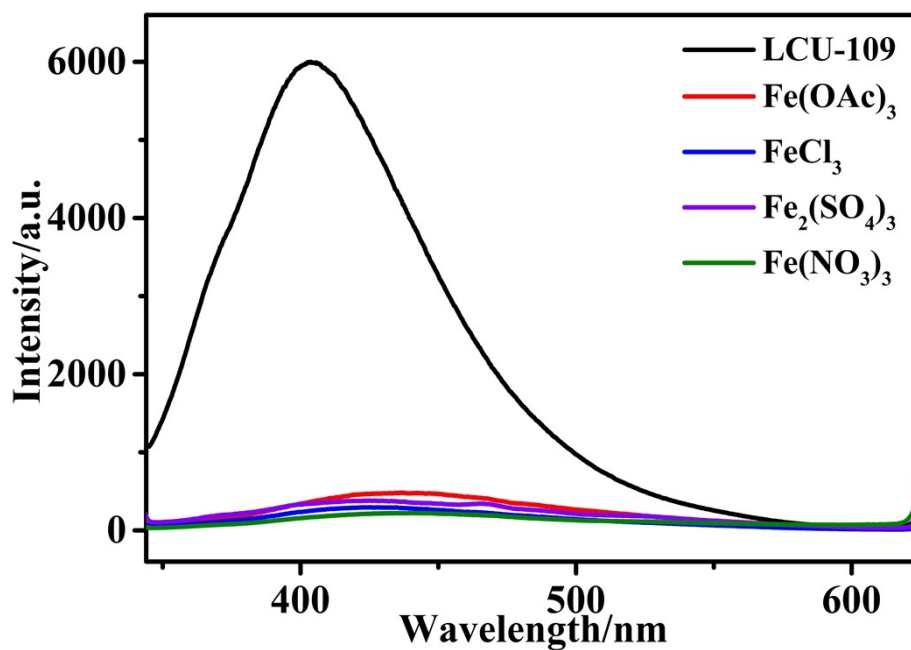

Fig. S13 The emission spectra of LCU-109 relative to different kinds of ferric salts.

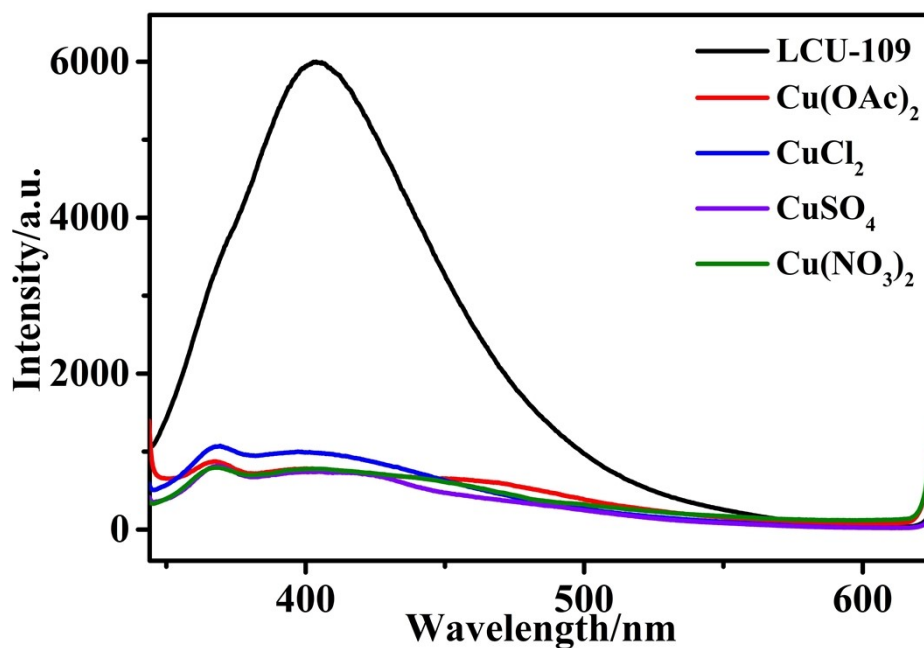

Fig. S14 The emission spectra of LCU-109 relative to different kinds of copper salts.

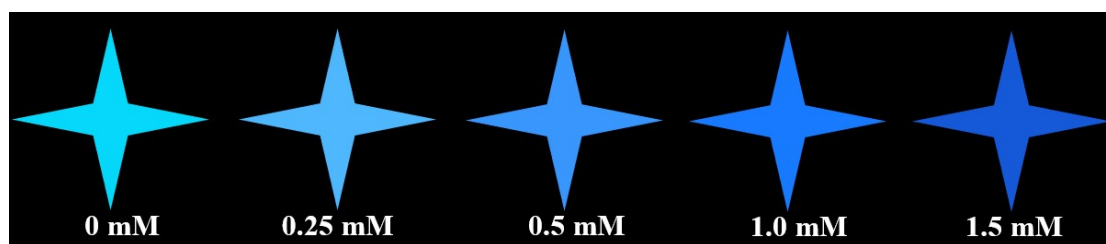

Fig. S15 Luminous test papers of LCU-109 prepared by soaking in different concentrations of  $\text{Cu}^{2+}$  aqueous solutions under 365 nm UV lamp.

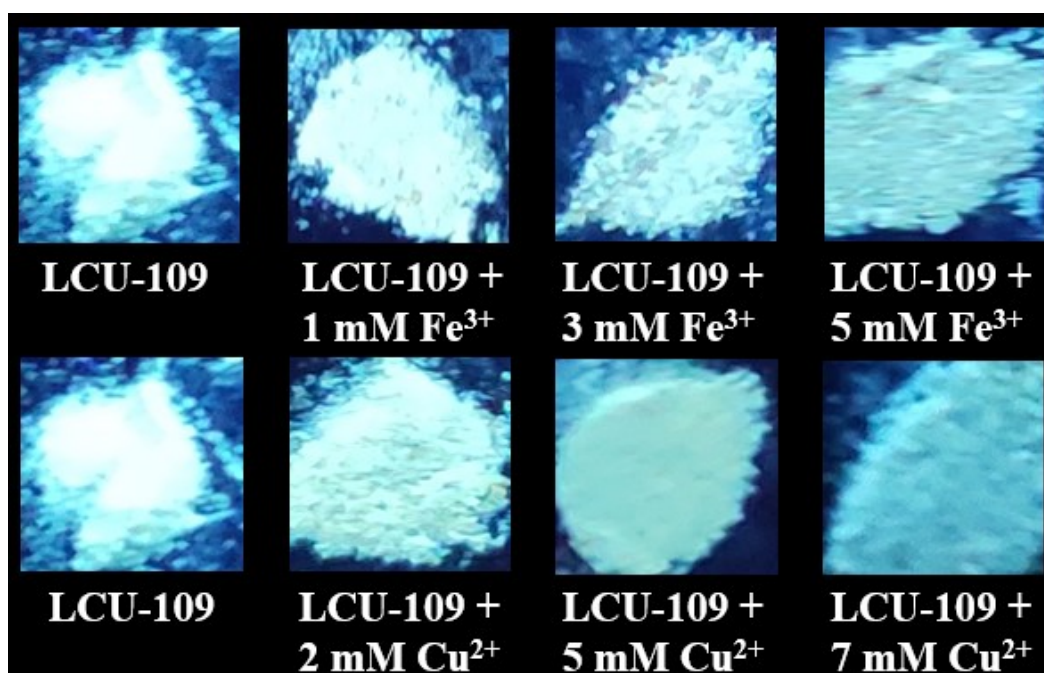

**Fig. S16** Photos of LCU-109 soaked in different concentrations of  $\text{Fe}^{3+}$  /  $\text{Cu}^{2+}$  aqueous solution under 365 nm UV lamp.

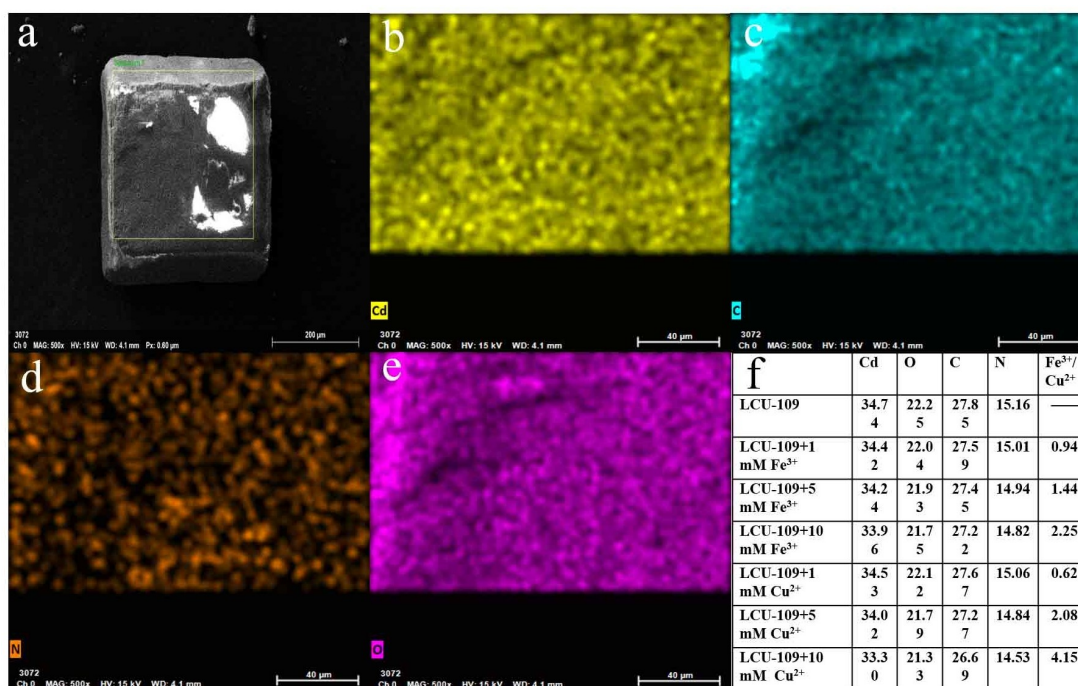

**Fig. S17** (a) SEM images of LCU-109. (b)-(e) EDS mapping images of selected regions: Cd, C, N, and O. (f) The element ratio of LCU-109 untreated and treated with different concentrations of  $\text{Fe}^{3+}$  or  $\text{Cu}^{2+}$  aqueous solution.

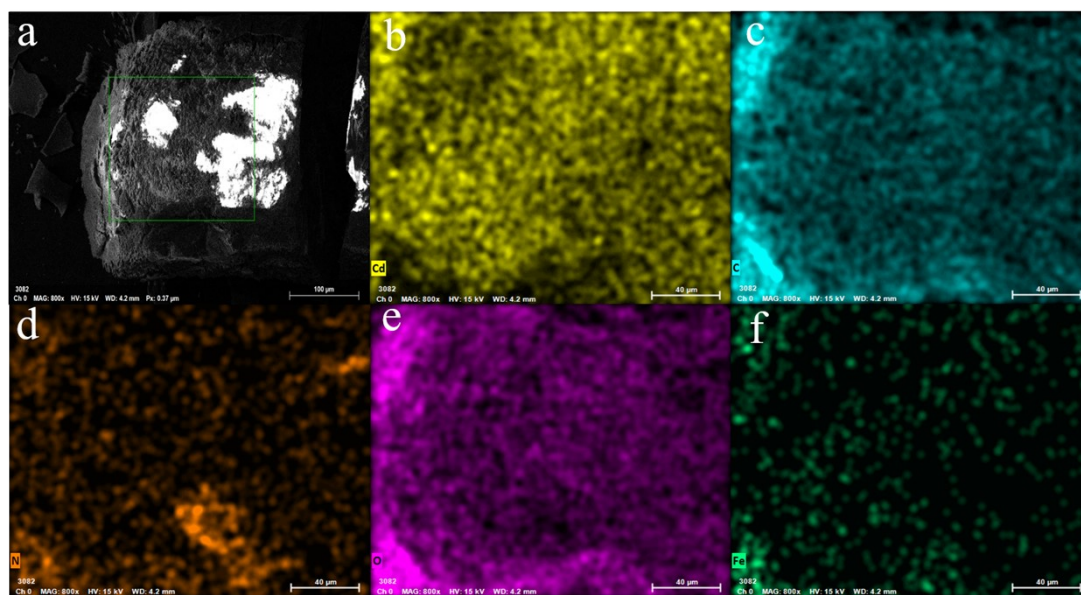

**Fig. S18** (a) SEM images of LCU-109 treated with 1 mM Fe<sup>3+</sup> aqueous solution. (b)-(f) EDS mapping images of selected regions: Cd, C, N, O and Fe.

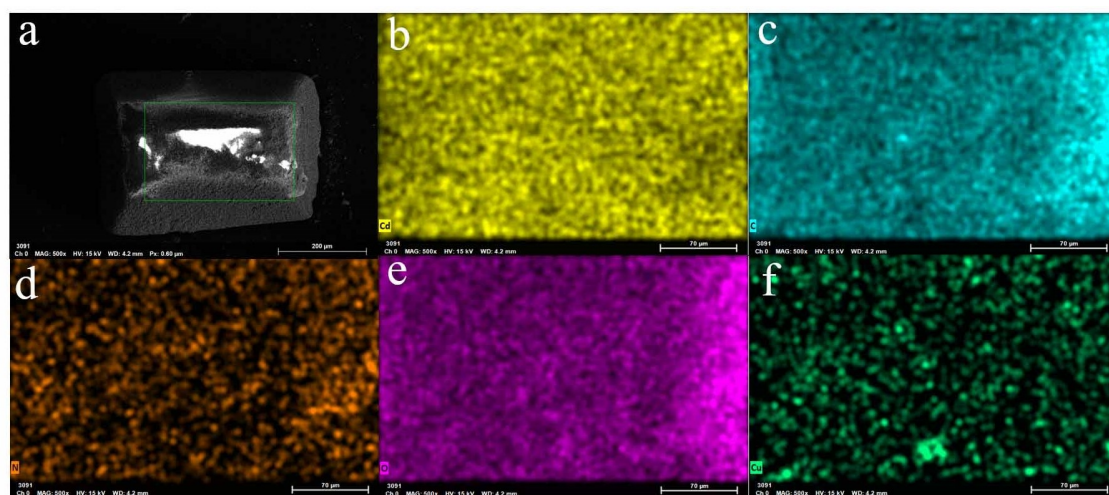

**Fig. S19** (a) SEM images of LCU-109 treated with 5 mM Fe<sup>3+</sup> aqueous solution. (b)-(f) EDS mapping images of selected regions: Cd, C, N, O and Fe.

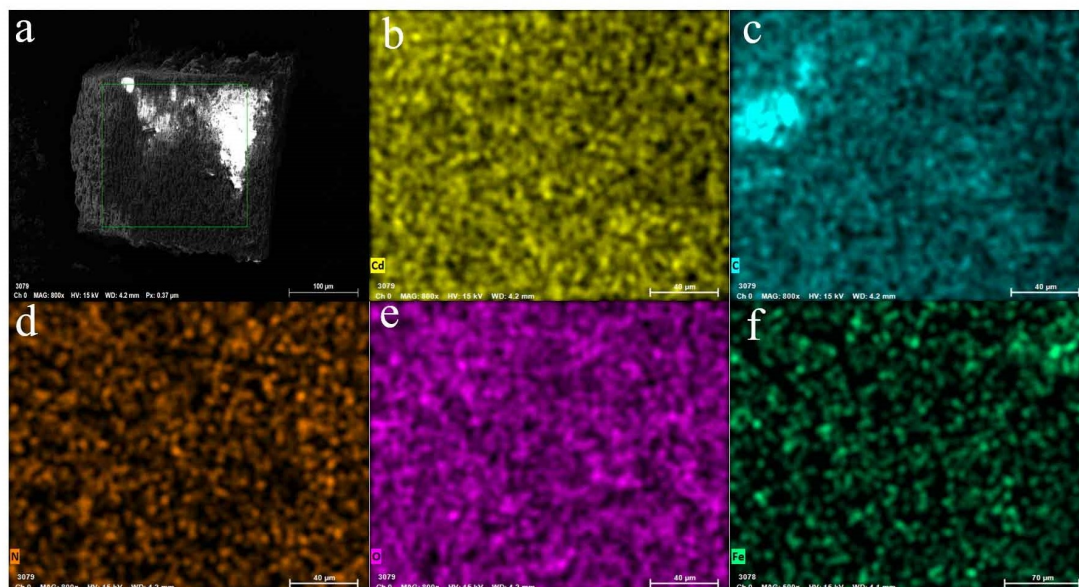

**Fig. S20** (a) SEM images of LCU-109 treated with 10 mM Fe<sup>3+</sup> aqueous solution. (b)-(f) EDS mapping images of selected regions: Cd, C, N, O and Fe.

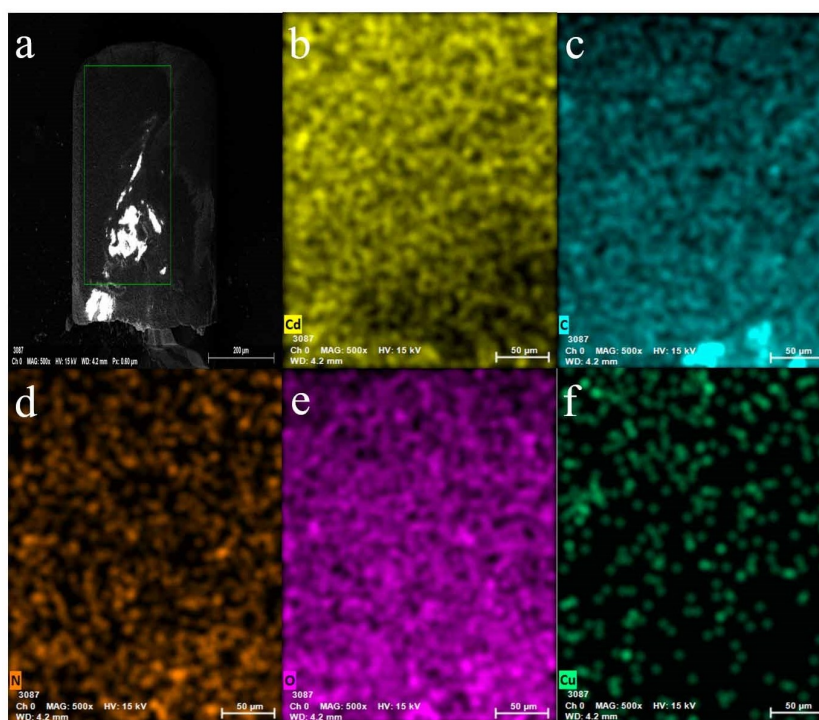

**Fig. S21** (a) SEM images of LCU-109 treated with 1 mM Cu<sup>2+</sup> aqueous solution. (b)-(f) EDS mapping images of selected regions: Cd, C, N, O and Cu.

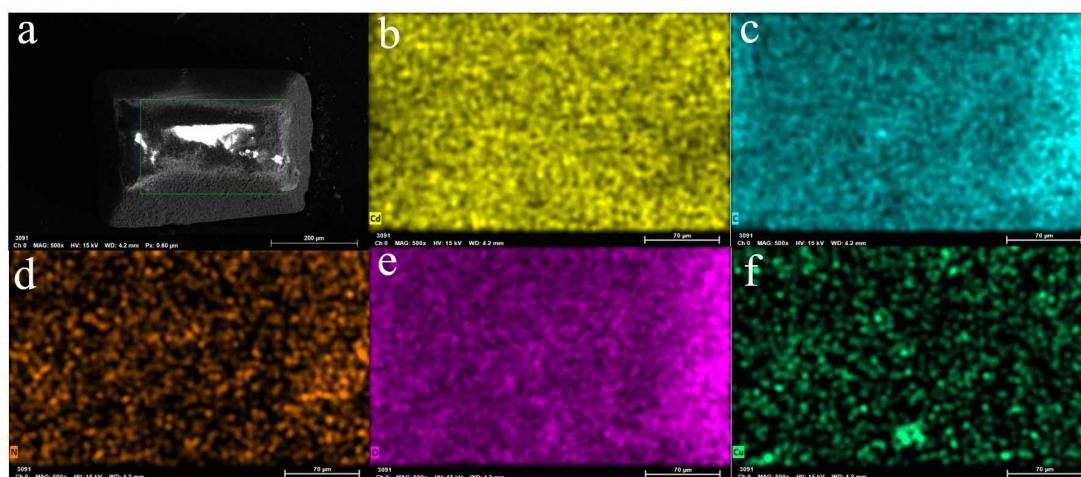

**Fig. S22** (a) SEM images of LCU-109 treated with 5 mM Cu<sup>2+</sup> aqueous solution. (b)-(f) EDS mapping images of selected regions: Cd, C, N, O and Cu.

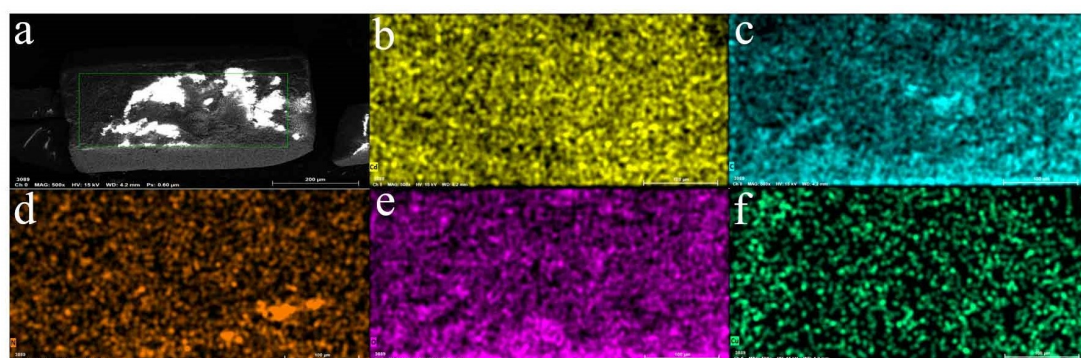

**Fig. S23** (a) SEM images of LCU-109 treated with 10 mM Cu<sup>2+</sup> aqueous solution. (b)-(f) EDS mapping images of selected regions: Cd, C, N, O and Cu.

**Table S3.** The  $K_{SV}$  values and LODs comparison for sensing Fe<sup>3+</sup>.

| Fe <sup>3+</sup>                                                           |                     |          |                  |           |
|----------------------------------------------------------------------------|---------------------|----------|------------------|-----------|
| MOFs/Guidelines                                                            | $K_{SV}/M^{-1}$     | LODs/ppm | Medium used      | Refs.     |
| <b>LCU-109</b>                                                             | $5.71 \times 10^4$  | 0.0043   | H <sub>2</sub> O | This work |
| [Zn <sub>2</sub> (tpeb)(bpdc) <sub>2</sub> ]                               | $1.326 \times 10^4$ | 0.0494   | H <sub>2</sub> O | S4        |
| [Zn <sub>2</sub> Na <sub>2</sub> (TPHC)(4,4'-Bipy)(DMF)]·8H <sub>2</sub> O | $5.77 \times 10^4$  | 0.358    | DMF              | S5        |
| MIL-53(Al)                                                                 | ----                | 0.0504   | H <sub>2</sub> O | S6        |
| [Cd <sub>2</sub> (L)(BPDC) <sub>2</sub> ]·DMF·9H <sub>2</sub> O            | $1.08 \times 10^4$  | 0.297    | DMF              | S7        |
| ZnMOF-74                                                                   | $1.35 \times 10^7$  | 0.300    | H <sub>2</sub> O | S8        |



|                                                                                               |                       |        |                           |     |
|-----------------------------------------------------------------------------------------------|-----------------------|--------|---------------------------|-----|
| [Mg <sub>2</sub> (APDA) <sub>2</sub> (H <sub>2</sub> O) <sub>3</sub> ]·5DMA·5H <sub>2</sub> O | 2.06×10 <sup>4</sup>  | 0.152  | DMF                       | S9  |
| [Cd(bipa)] <sub>n</sub>                                                                       | 1.9×10 <sup>4</sup>   | 0.076  | H <sub>2</sub> O          | S10 |
| ZSTU-1                                                                                        | 2.69×10 <sup>6</sup>  | 0.0036 | H <sub>2</sub> O          | S11 |
| [Zn <sub>1.5</sub> (dttz)(Hdpa)] <sub>n</sub>                                                 | 1.79×10 <sup>4</sup>  | 1.45   | DMF                       | S12 |
| [Cd(Hcbic)] <sub>n</sub>                                                                      | 1.8×10 <sup>5</sup>   | 1.74   | H <sub>2</sub> O          | S13 |
| [Zn <sub>5</sub> (hfipbb) <sub>4</sub> (trz) <sub>2</sub> (H <sub>2</sub> O) <sub>2</sub> ]   | 4.1×10 <sup>5</sup>   | 10.08  | H <sub>2</sub> O          | S14 |
| [Zn <sub>2</sub> (TPOM)(NDC) <sub>2</sub> ]·3.5H <sub>2</sub> O                               | 1.9×10 <sup>4</sup>   | 0.112  | H <sub>2</sub> O          | S15 |
| Cd <sub>3</sub> (Hdcapdc) <sub>2</sub>                                                        | 1.04×10 <sup>4</sup>  | 5.798  | H <sub>2</sub> O          | S16 |
| r-PDANPs                                                                                      | ----                  | 0.0084 | H <sub>2</sub> O          | S17 |
| L                                                                                             | 1.44×10 <sup>3</sup>  | 0.550  | DMSO/<br>H <sub>2</sub> O | S18 |
| PMDA-TAPB                                                                                     | 1.087×10 <sup>4</sup> | 0.0202 | DMF                       | S19 |
| TT-COF                                                                                        | 5.63×10 <sup>3</sup>  | 0.0469 | EtOH                      | S20 |

**Table S4.** The  $K_{sv}$  values and LODs comparison for sensing Cu<sup>2+</sup>.

| Cu <sup>2+</sup>                                             |                      |          |                  |           |
|--------------------------------------------------------------|----------------------|----------|------------------|-----------|
| MOFs/Guidelines                                              | $K_{sv}/M^{-1}$      | LODs/ppm | Medium used      | Refs .    |
| <b>LCU-109</b>                                               | 2.81×10 <sup>4</sup> | 0.0028   | H <sub>2</sub> O | This work |
| [Zn <sub>2</sub> (L) <sub>2</sub> (2,2'-bipy) <sub>2</sub> ] | 2.82×10 <sup>3</sup> | 1.04     | DMF              | S21       |
| [Zn(L)(4,4'-bipy)]                                           | 2.41×10 <sup>3</sup> | 2.57     | DMF              | S21       |
| NH <sub>2</sub> -MIL-125(Ti)                                 | 3.2×10 <sup>4</sup>  | 0.0403   | H <sub>2</sub> O | S22       |
| [Cd(L)(atpa)] <sub>n</sub>                                   | 8.89×10 <sup>3</sup> | 0.0768   | H <sub>2</sub> O | S23       |
| MIL-53-L                                                     | 6.15×10 <sup>3</sup> | ----     | H <sub>2</sub> O | S24       |

|                                                                                                |                     |        |                           |     |
|------------------------------------------------------------------------------------------------|---------------------|--------|---------------------------|-----|
| $\{[\text{Nd}_2(\text{NH}_2\text{-BDC})_3(\text{DMF})_4]\}_n$                                  | ----                | 1.397  | DMF                       | S25 |
| $[\text{Eu}(\text{pdc})_{1.5}(\text{dmf})] \cdot (\text{DMF})_{0.5}(\text{H}_2\text{O})_{0.5}$ | 89.4                | ----   | DMF                       | S26 |
| Cd-MOF-74                                                                                      | $1.806 \times 10^3$ | 5      | H <sub>2</sub> O          | S27 |
| $\text{Zr}_6\text{O}_4(\text{OH})_4(\text{TCPP-H}_2)_3$                                        | $4.5 \times 10^5$   | 0.0043 | H <sub>2</sub> O          | S28 |
| $\text{NH}_2\text{-MIL-101(Al)@ZIF-8}$                                                         | ----                | 0.0109 | H <sub>2</sub> O          | S29 |
| Eu(bcpba)                                                                                      | $5.7 \times 10^4$   | 31.87  | DMF                       | S30 |
| L                                                                                              | $3.32 \times 10^4$  | 0.674  | DMSO/<br>H <sub>2</sub> O | S18 |
| Alkyne-modified AuNPs                                                                          | ----                | 0.369  | H <sub>2</sub> O          | S31 |
| CorMeO-COF                                                                                     | $4.68 \times 10^4$  | 0.0718 | THF                       | S32 |
| Silica nanoparticles                                                                           | ----                | 0.0254 | HEPES                     | S33 |

## References

- S1 T. Y. Gu, M. Dai, D. J. Young, Z. G. Ren and J. P. Lang, *Inorg. Chem.*, 2017, **56**, 4668–4678.
- S2 Q. Tang, S. X. Liu, Y. W. Liu, J. Miao, S. J. Li, L. Zhang, Z. Shi and Z. P. Zheng, *Inorg. Chem.*, 2013, **52**, 2799–2801.
- S3 Z. M. Hao, X. Z. Song, M. Zhu, X. Meng, S. N. Zhao, S. Q. Su, W. T. Yang, S. Y. Song and H. J. Zhang, *J. Mater. Chem. A*, 2013, **1**, 11043–11050.
- S4 B. B. Rath and J. J. Vittal, *Inorg. Chem.*, 2020, **59**, 8818–8826.
- S5 C. Y. Yu, X. D. Sun, L. F. Zou, G. H. Li, L. R. Zhang and Y. L. Liu, *Inorg. Chem.*, 2019, **58**, 4026–4032.
- S6 C. X. Yang, H. B. Ren and X. P. Yan, *Anal. Chem.*, 2013, **85**, 7441–7446.
- S7 D. Zhao, X. H. Liu, Y. Zhao, P. Wang, Y. Liu, M. Azam, S. I. A. Resayes, Y. Lu and W. Y. Sun, *J. Mater. Chem. A*, 2017, **5**, 15797–15807.
- S8 L. L. Hou, Y. H. Song, Y. J. Xiao, R. Wu and L. Wang, *Microchem. J.*, 2019, **150**, 104154.

- 
- S9 Z. F. Wu, L. K Gong and X. Y. Huang, *Inorg. Chem.*, 2017, **56**, 7397–7403.
- S10 B. Zhu, G. M. Huang, Y. N. He, J. S. Xie, T. He, J. L. Wang and Z. Zong, *RSC Adv.*, 2020, **10**, 34943–34952.
- S11 F. Y. Zhong, C. Q. Li, Y. B. Xie, H. Xu and J. K. Gao, *J. Solid. State. Chem.*, 2019, **278**, 120892.
- S12 Y. W. Li, J. Li, X. Y. Wan, D. F. Sheng, H. Yan, S. S. Zhang, H. Y. Ma, S. N. Wang, D. C. Li, Z. Y. Gao, J. M. Dou and D. Sun, *Inorg. Chem.*, 2021, **60**, 671–681.
- S13 F. F. Li, M. L. Zhu and L. P. Lu, *J. Solid. State. Chem.*, 2018, **261**, 31–36.
- S14 J. Wang, M. Jiang, L. Yan, R. Peng, M. J. Huangfu, X. X. Guo, Y. Li and P. Y. Wu, *Inorg. Chem.*, 2016, **55**, 12660–12668.
- S15 R. Lv, H. Li, J. Su, X. Fu, B. Y. Yang, W. Gu and X. Liu, *Inorg. Chem.*, 2017, **56**, 12348–12356.
- S16 W. Q. Tong, W. N. Liu, J. G. Cheng, P. F. Zhang, G. G. Li, L. Hou, Y. Y. Wang, *Dalton. Trans.*, 2018, **47**, 9466–9473.
- S17 H. G. Yin, K. Zhang, L. J. Wang, K. Zhou, J. Zeng, D. Gao, Z. N. Xia and Q. F. Fu, *Nanoscale*, 2018, **10**, 18064–18073.
- S18 S. K. Sahoo, D. Sharma, A. Moirangthem, A. Kuba, R. Thomas, R. Kumar, A. Kuwar, H. J. Choi and A. Basu, *J. Lumin.*, 2016, **172**, 297–303.
- S19 X. Liang, Z. J. Ni, L. M. Zhao, B. Ge, H. Zhao and W. Z. Li, *Microchem. J.*, 2021, **170**, 106663.
- S20 T. Zhang, A. Salah, S. H. Chang, Z. Zhanga and G. Wang, *Tetrahedron*, 2021,

---

96, 132405.

- S21 J. Wang, Y. Y. Zhong, C. Bai, Y. C. Guan, Y. Pan and H. M. Hu, *J. Solid. State. Chem.*, 2020, **288**, 121381.
- S22 M. Kaur, S. K. Mehta and S. K. Kansal, *Mater. Chem. Phys.*, 2020, **254**, 123539.
- S23 Y. J. Yang, D. Liu, Y. H. Li and G. Y. Dong, *Polyhedron*, 2019, **159**, 32–42.
- S24 C. Liu and B. Yan, *Sensor Actuat. B Chem.*, 2016, **235**, 541–546.
- S25 J. Luo, B. S. Liu, C. Cao and F. Wei, *Inorg. Chem. Commun.*, 2017, **76**, 18–21.
- S26 B. L. Chen, L. B. Wang, Y. Q. Xiao, F. R. Fronczek, M. Xue, Y. J. Cui and G. D. Qian, *Angew. Chem. Int. Ed.*, 2008, **48**, 500–503.
- S27 T. T. Zheng, J. Zhao, Z. W. Fang, M. T. Li, C. Y. Sun, X. Li, X. Long. Wang and Z. M. Su, *Dalton. Trans.*, 2017, **46**, 2456–2461.
- S28 L. N. Li, S. S. Shen, R. Y. Lin, Y. Bai and H. W. Liu, *Chem. Commun.*, 2017, **53**, 9986–9989.
- S29 L. Zhang, J. Wang, X. Y. Ren, W. T. Zhang, T. S. Zhang, X. N. Liu, T. Du, T. Li and J. L. Wang, *J. Mater. Chem. A*, 2018, **6**, 21029–21038.
- S30 R. R. Ma, Z. W. Chen, S. N. Wang, Q. X. Yao, Y. W. Li, J. Lu, D. C. Li and J. M. Dou, *J. Solid. State. Chem.*, 2017, **252**, 142–151.
- S31 S. J. Lin, S. W. Liu, G. F. Dai, X. J. Zhang, F. Xia and Y. Dai, *Dyes. Pigm.*, 2021, **195**, 109726.
- S32 Y. J. Li, M. H. Chen, Y. N. Han, Y. Q. Feng, Z. J. Zhang and B. Zhang, *Chem. Mater.*, 2020, **32**, 2532–2540.
- S33 R.D. S. Fernandes and I. M. R. Jr, *Anal. Methods*, 2021, **13**, 1970–1975.
